# Supplementary material
Source: Springer Nature journal article supplement (https://www.springermedizin.de/resource/supplementary/12967_2013_1702_MOESM10_ESM.pdf/9575148)

# Threshold cycles of EBV miRNAs during qPCR analysis of sera from different geographic locations

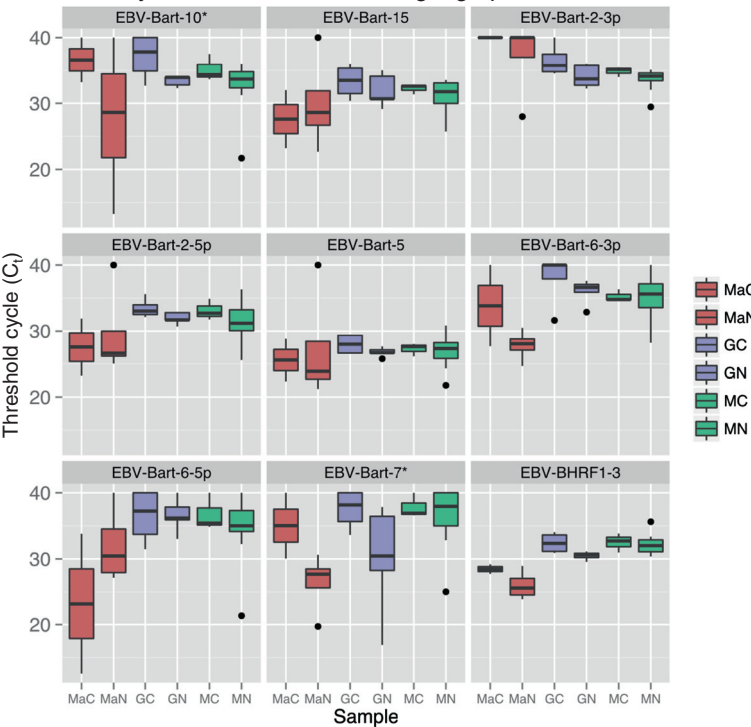

Supplement: MOESM10 [file 9575148]
